# Supplementary material for: Pomegranate Pomace Extract with Antioxidant, Anticancer, Antimicrobial, and Antiviral Activity Enhances the Quality of Strawberry-Yogurt Smoothie
Source: MDPI journal article supplement (doi:10.3390/bioengineering9120735), 2022-11-28
Supplement: s1 [file s1]

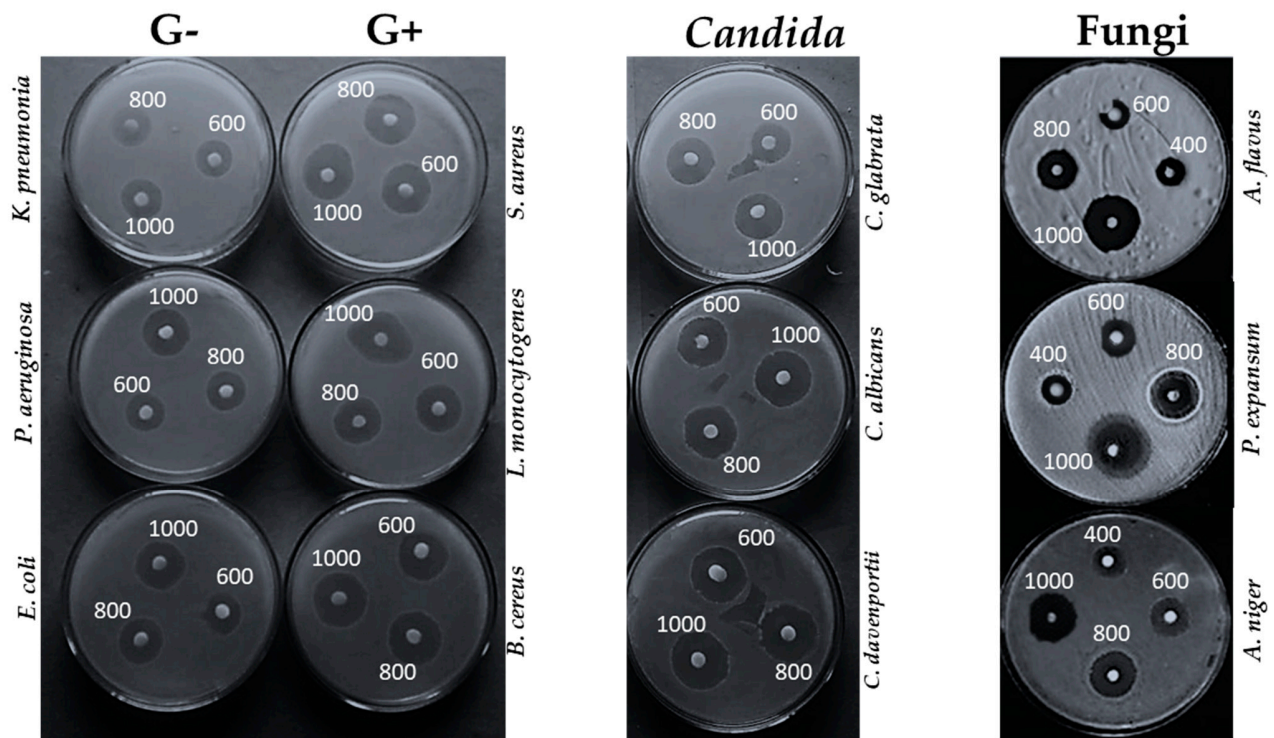

Figure S1. Inhibition zones diameters of PP extracts (0.6, 0.8, and 1.0 mg/mL) against tested bacteria (*S. aureus*, *L. monocytogenes*, *B. cereus*, *P. aeruginosa*, *K. pneumonia*, *E. coli*); Candida (*C. glabrata*, *C. albicans*, *C. davenportii*), and fungi (*A. niger*, *A. flavus*, *P. expansum*).
